# Supplementary material
Source: Springer Nature journal article supplement (https://www.springermedizin.de/resource/supplementary/12939_2010_177_MOESM1_ESM.pdf/9551654)
Supplement: MOESM1 [file 9551654]

---

**Is the health of immigrants better than that of  
the native-born population at time of arrival?**

**Yes**

**No**

---

**Improves**

A

B

**Remains the  
same**

C

D

**Deteriorates**

E

F

---

**Over time,  
the health of  
immigrants...**
